# Supplementary material for: Cleavage of Si–Ar bond vs Si–Me bond: a remarkable counterion effect on reactivity
Source: Royal Society of Chemistry journal article supplement (doi:10.1039/b205373j), 2002-01-01
Supplement: b205373j.doc [file b205373j.doc]

# Supplementary data

**Cleavage of Si-Ar bond *vs* Si-Me bond :**

**a remarkable counterion effect on reactivity**

Suresh Kumar Tipparaju, Sunil K. Mandal[[1]](#footnote-2), Surojit Sur[[2]](#footnote-3)¶, Vedavati G. Puranik[[3]](#footnote-4)§ and Amitabha Sarkar*

### SUPPORTING INFORMATION

**Spectroscopic data :**

**Complex (1).**

Red solid (m.p. 96-97 oC). IR (Nujol): 1973, 1900, 1666, 1607 cm-1. 1H NMR (200 MHz, CDCL3):  7.88 (d, *J* = 15 Hz, 1H), 7.67-7.63 (m, 2H), 7.45-7.43 (m, 3H), 7.20 (d, *J* = 15 Hz, 1H), 5.76 (d, *J* = 6 Hz, 1H), 5.61-5.43 (m, 4H), 0.36 (s, 9H). 13C NMR (50.32 MHz, CDCl3): 231.8, 145.8, 134.3, 131.1, 129.1, 128.7, 120.9, 107.7, 101.1, 98.8, 93.3, 92.6, 0.4. Anal. Calcd for C21H20CrSiO4: C, 60.56; H, 4.84. Found: C, 60.62; H, 4.83.

***Complex (2a).**

Yellow Solid (m.p. 137-138 oC). IR (Nujol): 3535, 1961, 1894, 1873 cm-1. 1H NMR (300 MHz, CDCl3):  7.47 (d, *J* = 6 Hz, 2H), 7.40-7.27 (m, 3H), 6.78 (d, *J* = 16 Hz, 1H), 6.46 (d, *J* = 16 Hz, 1H), 5.89-5.75 (m, 1H), 5.70 (d, *J* = 6 Hz, 1H), 5.58 (t, *J* = 6 Hz , 1H), 5.27 (d, *J* = 8 Hz, 1H), 5.19-5.07 (m, 2H), 2.78-2.63 (m, 2H), 2.46 (s, 1H), 0.43 (s, 9H). 13C NMR (75.48 MHz, CDCl3): 233.1, 136.2, 132.5, 132.2, 131.3, 128.7, 128.2, 126.8, 125.6, 120.9, 101.8, 96.5, 95.2, 89.7, 89.5, 76.5, 49.1, 3.5. Anal. Calcd for C24H26CrSiO4 : C, 62.86; H, 5.72. Found: C, 62.39; H, 5.55.

**Complex (2b).**

Yellow Solid (m.p. 98-99 oC). IR (Nujol): 3547, 1960, 1877, 1861 cm-1. 1H NMR (300 MHz, CDCl3):  7.35-7.27 (m, 5H), 6.43 (d, *J* = 16 Hz, 1H), 6.31 (d, *J* = 16 Hz, 1H), 6.02-5.88 (m, 1H), 5.70 (d, *J* = 6 Hz, 1H), 5.63 (t, *J* = 6 Hz, 1H), 5.40 (d, *J* = 12 Hz, 2H), 5.27-5.23 (m, 2H), 2.96-2.81 (m, 2H), 2.62 (s, 1H), 0.38 (s, 9H). 13C NMR (75.48 MHz, CDCl3): 233.4, 136.2, 135.6, 132.0, 130.0, 128.7, 128.0, 126.6, 126.2, 122.1, 101.5, 98.8, 94.6, 90.7, 89.5, 75.4, 46.9, 3.3. Anal. Calcd for C24H26CrSiO4: C, 62.86; H, 5.72. Found: C, 62.67; H, 5.85.

**Complex (2').**

Red oil. IR (Nujol): 1965 (s), 1693 (s), 1641 (m) cm-1. 1H NMR(200 MHz,CDCL3):  7.35-7.19 (m, 5H), 5.77-5.64 (m, 2H), 5.49-5.45 (m, 3H), 5.08-4.98 (m, 2H), 3.44 (quintet, *J* = 7 Hz 1H), 3.17-32.99 (m, 2H), 2.45 (t, *J* = 7 Hz, 2H), 0.18 (s, 9H). 13C NMR(50.32, MHz, CDCl3): 231.4, 143.4, 136.1, 128.5, 127.5, 126.5, 117.0, 104.0, 102.0, 98.2, 93.4, 91.8, 43.5, 40.7, 40.5, 0.4. Anal.Calcd for: C, 62.86; H, 5.72.Found: C, 63.52; H, 6.02.

**Complex (3).**

Yellow Solid (m.p. 108oC). IR (Nujol): 1958, 1884, 1867 cm-1. 1H NMR (300 MHz, CDCl3):  7.54-7.34 (m, 5H), 6.70 (d, *J* = 16 Hz, 1H), 6.50 (d, *J* = 16 Hz, 1H), 5.92-5.72(m, 2H), 5.44 (t, *J*= 6 Hz, 1H), 5.29-4.94 (m, 5H), 2.93 (dd, *J* = 7, 14 Hz, 1H), 2.64 (dd, *J* = 7, 14 Hz, 1H), 0.21 (s, 9H). 13C NMR (75.48 MHz, CDCl3): 233.2, 136.0, 133.7, 132.6, 130.5, 128.9, 128.3, 126.8, 118.9, 116.8, 94.6, 94.1, 93.4, 89.2, 88.9, 46.2, 2.2. Anal.Calcd for C24H26CrSiO4: C, 62.86; H, 5.72. Found: C, 62.42; H, 5.84.

**Complex (4a).**

Yellow Solid (m.p. 98oC). IR (Nujol): 1962, 1892, 1871 cm-1. 1H NMR (200 MHz, CDCl3):  7.48-7.25 (m, 5H), 6.79 (d, *J* = 15 Hz, 1H), 6.37 (d, *J* = 15 Hz, 1H), 5.79-5.58 (m, 1H), 5.55-5.48 (m, 2H), 5.34 (d, *J* = 6 Hz, 1H), 5.18 (d, *J* = 6 Hz, 1H), 5.13-4.99 (m, 2H), 2.60 (d of AB quartet, *J* = 7, 14 Hz, 2H), 0.66 (s, 3H), 0.50 (s, 3H). 13C NMR (50.32 MHz, CDCl3): 232.3, 159.6, 136.5, 132.4, 131.8, 128.5, 128.4, 128.0, 127.5, 126.8, 119.2, 116.8, 96.0, 93.8, 93.5, 90.5, 86.5, 85.2, 49.4, 1.7. Anal.Calcd for C23H22CrSiO4: C, 62.43; H, 5.01. Found: C, 62.08; H, 5.11.

**Complex (4b).**

Yellow Solid (m.p. 119oC). IR (Nujol): 1965, 1887, 1867 cm-1. 1H NMR (300 MHz, CDCl3):  7.32-7.27 (m, 5H), 6.53 (d, *J* = 16 Hz, 1H), 6.23 (d, *J* = 16 Hz, 1H), 6.01-5.88 (m, 1H), 5.48-5.45 (m, 3H ), 5.31-5.17 (m, 3H), 2.81 (d of AB quartet, *J* = 7, 14 Hz, 2H), 0.68 (s, 3H), 0.45 (s, 3H). 13C NMR (50.32 MHz, CDCl3): 232.7, 136.2, 134.2, 133.0, 129.1, 128.6, 127.9, 126.6, 118.7, 93.1, 92.4, 92.0, 88.1, 84.8, 47.5, 1.9, 0.1. Anal.Calcd for C23H22CrSiO4: C, 62.43; H, 5.01. Found: C, 62.15; H, 4.81.

***Data of the analogous complexes reported :**

*p*-Tolyl analogue of complex **2a :**

**ref 6** : Sur, S.; Mandal, S. K.; Ganesh, S.; Puranik, V. G.; Sarkar, A. *Indian J. Chem*. *Sect.B.* **2001**, *40B*, 1063-1071

Yellow Crystalline solid, m.p. 164 C;IR (Nujol): 3030, 1960, 1880 cm-1;1H NMR(200 MHz, CDCl3):  7.40 (d, 2H, *J* = 9 Hz); 7.20 (d, 2H, *J* = 9 Hz); 6.75 (d, 1H, *J* = 16 Hz); 6.40 (d, 1H, *J* = 16 Hz); 5.70-5.95 (m, 2H); 5.60 (t, 1H, *J* = 6 Hz); 5.25 (m, 2H); 5.10 (m, 2H); 2.40 (m, 2H); 2.45 (s, 3H); 2.75 (m, 2H); 0.45 (s, 9H) 13C NMR : 233.4, 138.2, 133.6, 132.7, 131.3, 129.6, 129.4, 126.9, 126.1, 121.0, 102.1, 90.0, 89.8, 49.2, 21.4, 3.7 Anal. Calcd for C25H28CrSiO4: C 63.54; H,5.97. Found: C,63.21; H,5.90. The crystal structure of this compound is given below.

**Experimental Section**

All reactions were performed under an inert atmosphere of argon, using freshly distilled and degassed solvents. Infrared spectra were recorded on a Perkin-Elmer 599B spectrometer in Nujol. NMR spectra were recorded on a Bruker AC 200 operating at 1H (200 MHz) and 13C (50.3 MHz) and Bruker MSL-300 operating at 1H (300 MHz) and 13C (75.48 MHz) spectrometers in CDCl3. Chemical shifts are reported in ppm downfield from TMS. Elemental analyses were carried out on a Carlo-Erba 1100 automatic analyzer by the analysts at NCL. Melting points in the Celsius scale were determined in open capillary tubes on a Thermonik Campbell melting point apparatus and are uncorrected. Usual workup comprised of quenching the reaction mixture with saturated NH4Cl solution at 0 0C, extraction with ether followed by evaporation of solvent in vaccum.

# a) Preparation of enone 1

A solution of benzaldehyde (280 mg, 2.64 mmol) and the *ortho*-trimethylsilyl acetophenone chromium tricarbonyl complex (577 mg, 1.76 mmol) in ethanol (10 mL) was cooled in ice salt bath. An ethanolic solution of KOH (99mg, 1.76 mmol) in 10 mL ethanol was added dropwise *via* a syringe. The reaction was monitored by TLC. After complete disappearance of starting material, ethanol was removed under reduced pressure and washed with water. The residue was extracted with dichloromethane. Removal of solvent provided the enone as red solid product **1**. The crude solid product was washed with pet ether (3 x 20 mL) and recrystallized from dichloromethane-pet ether to afford analytically pure sample (695mg, 95%).

**b) Reaction of 1 with Allylmagnesium Bromide- isolation of carbinols.**

To a solution of **1** (175 mg, 0.42 mmol ) in 5ml ether cooled to –78 0C in a dry ice-acetone bath freshly prepared allylmagnesium bromide (0.84 mmol, 0.84 ml from 1M ether solution) was added dropwise during which color of the reaction mixture turned from dark red to greenish yellow. The reaction was complete in 15 min (TLC). It was quenched at same temperature with saturated NH4Cl and extracted with ether to furnish crude product. Purification by flash column chromatography (2 % acetone: pet ether ) provided **2a** (87mg, 45%) and **2b** (98mg,51%).

**c) Reaction of 1 with Allyllithium- isolation of carbinol 2a and conjugate addition product 2′.**

To a solution of **1** (183mg, 0.44 mmol) in 5 ml ether cooled to –78 0C was added allyllithium (0.52 mmol, 1.04 ml from 0.5 M THF solution) dropwise when the color of the reaction mixture turned from dark red to orange yellow. The reaction was complete in 15 min (TLC). It was quenched at same temperature with saturated NH4Cl and extracted with ether followed by evaporation of solvent gave the crude product. Purification by flash column chromatography (2 % acetone: pet ether ) provided **2a** (78mg, 39 %) and the conjugate addition product **2′** (95mg,47%).

**d) Brook rearrangement of allyllithium addition on 1:**

To a solution of **1** (250mg, 0.6 mmol) in 6 ml ether cooled to –78 0C was added allyllithium (0.72 mmol, 1.44 ml from 0.5 M THF solution) dropwise during which the color of reaction mixture turned from dark red to orange yellow. It was allowed to warm up to room temperature (3 h) and was stirred for further 8 h. At the end, the reaction mixture was blackish green in color**.** After usual workup a crude product was obtained which was purified by flash column chromatography (2 % acetone : pet ether) affording **3** (110 mg, 40 %) and the conjugate addition product **2′** (124 mg,45 %).

**e) Brook rearrangement of carbinol 2a :**

To a solution of **2a** (137 mg, 0.3 mmol) in 4 ml ether cooled to –78 0C was added n-BuLi (0.45 mmol, 0.27 ml from 1.66 M n-hexane solution) dropwise. There was no change in the color. It was allowed to warm up to room temperature (3 h) and was stirred for further 8 h. At the end, the reaction mixture was blackish green in color**.** Usual workup gave the crude product which was purified by flash column chromatography (2 % acetone: pet ether) affording **3** (139 mg, 92 %).

**f) Exchange of Li with Magnesium counterion :**

Allyllithium was added (0.58 mmol, 1.2 ml from 0.5 M THF solution) dropwise to a solution of **1** (200mg, 0.48 mmol ) in 5 ml ether cooled to –78 0C when the color of the reaction mixture turned from dark red to orange yellow. The reaction was complete in 15 min (TLC). At this point was added MgBr2.OEt2 (1.44 mmol dissolved in 3 ml of dry ether) dropwise through a syringe. The reaction mixture was then allowed to warm up to room temperature (3 h) and was stirred for further 8 h. At the end, the reaction mixture was greenish brown in color**.** Usual workup gave the crude product which was purified by flash column chromatography (3 % acetone: pet ether ) to afford **4a** (85 mg,40 %) and the conjugate addition product **2′**(94 mg,44 %).

## g) Si-O cyclization- One pot procedure: formation of 4 from enone 1.

To a solution of **1** (416 mg, 1 mmol ) in 10 ml ether cooled to –78 0C was added freshly prepared allylmagnesium bromide (3 mmol, 3 ml from 1M ether solution) over 5 min during which period the color of the reaction mixture turned from dark red to greenish yellow. It was allowed to warm up to room temperature (3 h) and was stirred for further 8 h. At the end, the reaction mixture was orange in color. Usual work up gave the crude product which was filtered through a pad of neutral alumina. Evaporation of solvent followed by crystallization from ether/pentane at < 5 0C afforded **4b** (234 mg, 53%). Mother liquor was filtered through alumina and concentrated. Crystallization of the residue from DCM/pet ether provided **4a** (186 mg, 45%).

**h) Cyclization in presence of benzophenone : Trapping the Methyl anion.**

To a solution of **1** (832 mg, 2 mmol ) in 20 ml ether cooled to –78 0C was added freshly prepared allylmagnesium bromide (6 mmol, 6 ml from 1M ether solution) over 6-8 min during which period the color of the reaction mixture turned from dark red to greenish yellow. Benzophenone (437 mg, 2.4 mmol in 3 ml dry ether) was added dropwise through a syringe to this mixture at the same temperature. It was allowed to warm up to room temperature (3 h) and was stirred for further 8 h. At the end, the reaction mixture was orange in color. Usual workup gave the crude product which was filtered through a pad of neutral alumina. Purification by flash column chromatography (2 % acetone : pet ether) provided **4** (725 mg, 82 % as 1:1.2 mixture of **4a** and **4b**) and diphenyl methyl carbinol(352 mg, 74 %).

## i) Reaction of 4a with MeLi : Low temperature workup.

To a solution of **4a** (203 mg, 0.46 mmol ) in 5 ml ether cooled to –78 0C was added MeLi (0.69 mmol, 0.5 ml from 1.33 M ether solution) dropwise. There was no change in the color. The reaction was complete in 15 min (TLC). Quenching at same temperature with saturated NH4Cl solution and extraction with ether gave the crude product. Purification by flash column chromatography (5 % acetone: pet ether) provided **2a** (190 mg, 85 %).

## j) Reaction of 4a with MeLi : room temperature, longer time.

To a solution of **4a** (115 mg, 0.26 mmol) in 5 ml ether cooled to –78 0C was added MeLi (0.39 mmol,0.3 ml from 1.33 M ether solution) dropwise. There was no change in the color. It was allowed to warm up to room temperature (3 h) and was stirred for further 8 h. At the end, the reaction mixture was blackish green in color**.** Usual workup gave the crude product which was purified by flash column chromatography (2 % acetone : pet ether) affording **3** (62 mg, 49 %) and **2a** (42 mg, 33 %).

1.  Present address : University of Utah, Salt Lake City, USA. [↑](#footnote-ref-2)
2. ¶ Present address : John Hopkins University, Baltimore, USA. [↑](#footnote-ref-3)
3. § Division of Physical Chemistry

   + Present address : Indian Association for the Cultivation of Science, Kolkata, India. [↑](#footnote-ref-4)
